# Supplementary material
Source: Springer Nature journal article supplement (https://www.springermedizin.de/resource/supplementary/13000_2010_339_MOESM4_ESM.pdf/9624310)

2007/2008 academic year

2009/2010 academic year

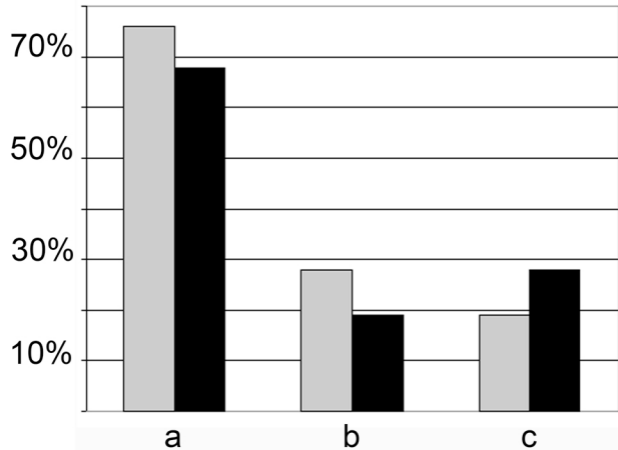

Supplement: MOESM4 [file 9624310]
